# Supplementary material for: Assessment of the Resource Potential of Baltic Sea Macroalgae
Source: MDPI journal article supplement (doi:10.3390/app12073599), 2022-04-01
Supplement: s1 [file s1]

# Supplementary Material for

## Assessment of Resource Potential of Baltic Sea Macroalgae

Yuliya Kulikova <sup>1,\*</sup>, Stanislav Sukhikh <sup>1</sup>, Olga Kalashnikova <sup>1</sup>, Evgeny Chupakhin <sup>1</sup>, Svetlana Ivanova <sup>2,3,\*</sup>, Boris Chubarenko <sup>4</sup>, Julia Gorbunova <sup>4</sup> and Olga Babich <sup>1</sup>

<sup>1</sup> Institute of Living Systems, Immanuel Kant Baltic Federal University, A. Nevskogo Street 14, 236016 Kaliningrad, Russia; stas-asp@mail.ru (S.S.); kalashnikova\_14@bk.ru (O.K.); chupakhinevgen@gmail.com (E.C.); olich.43@mail.ru (O.B.)

<sup>2</sup> Natural Nutraceutical Biotesting Laboratory, Kemerovo State University, Krasnaya Street 6, 650043 Kemerovo, Russia

<sup>3</sup> Department of General Mathematics and Informatics, Kemerovo State University, Krasnaya Street 6, 650043 Kemerovo, Russia

<sup>4</sup> Shirshov Institute of Oceanology, Russian Academy of Sciences, Nahimovskiy Prospect 36, 117997 Moscow, Russia; chuboris@mail.ru (B.C.); julia\_gorbunova@mail.ru (J.G.)

\* Correspondence: kulikova.nipu@gmail.com (Y.K.); pavvm2000@mail.ru (S.I.); Tel.: +7-9-127-849-858 (Y.K.); +7-3-842-396-832 (S.I.)

**Supplementary Materials for this manuscript include original HPLC data to lipid content analysis**

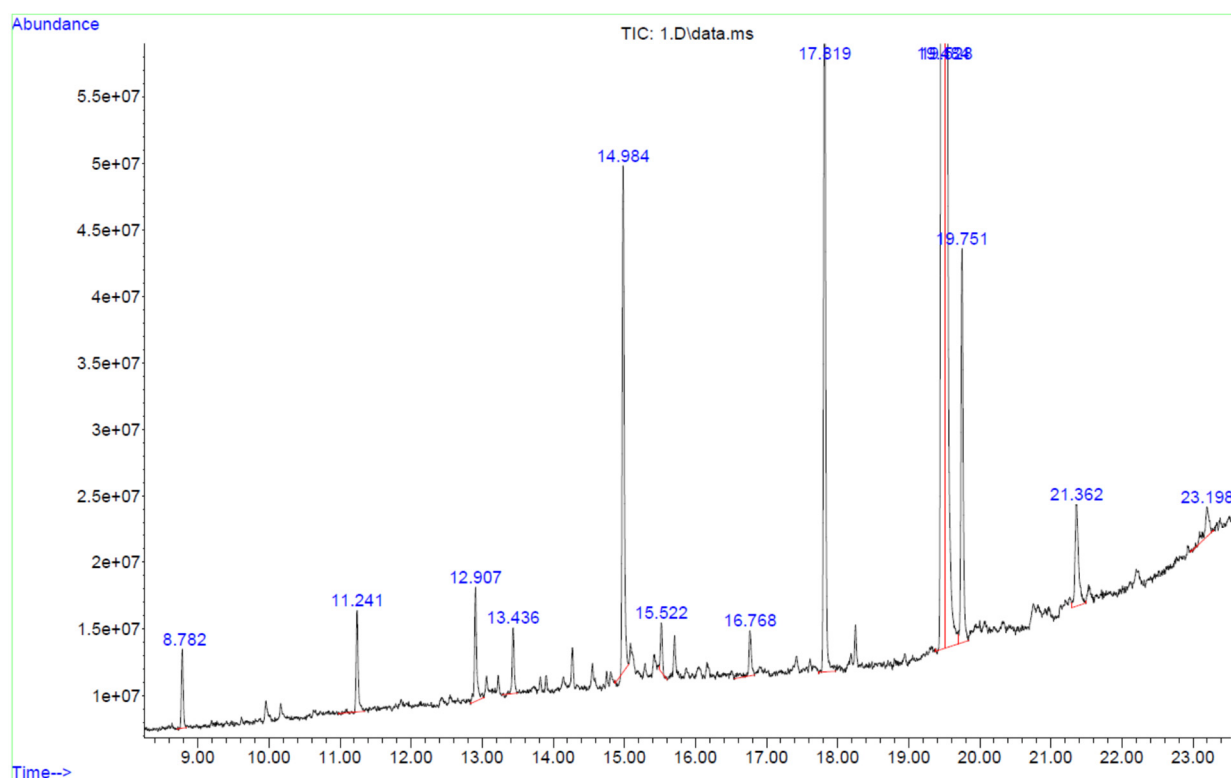

**Figure S1.** HPLC data to lipid content analysis of *Polysiphonia* algae biomass.

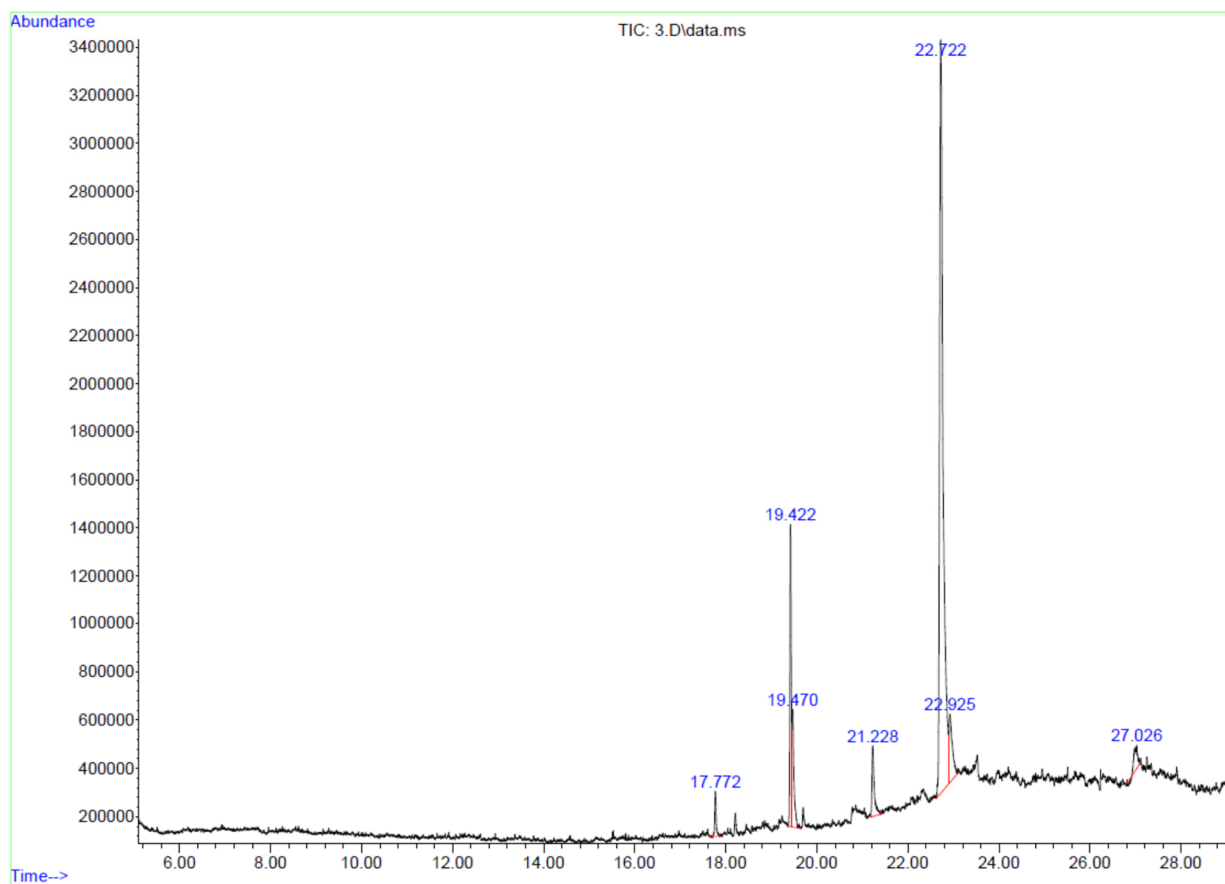

Figure S2. HPLC data to lipid content analysis of *Ulva* algae biomass.

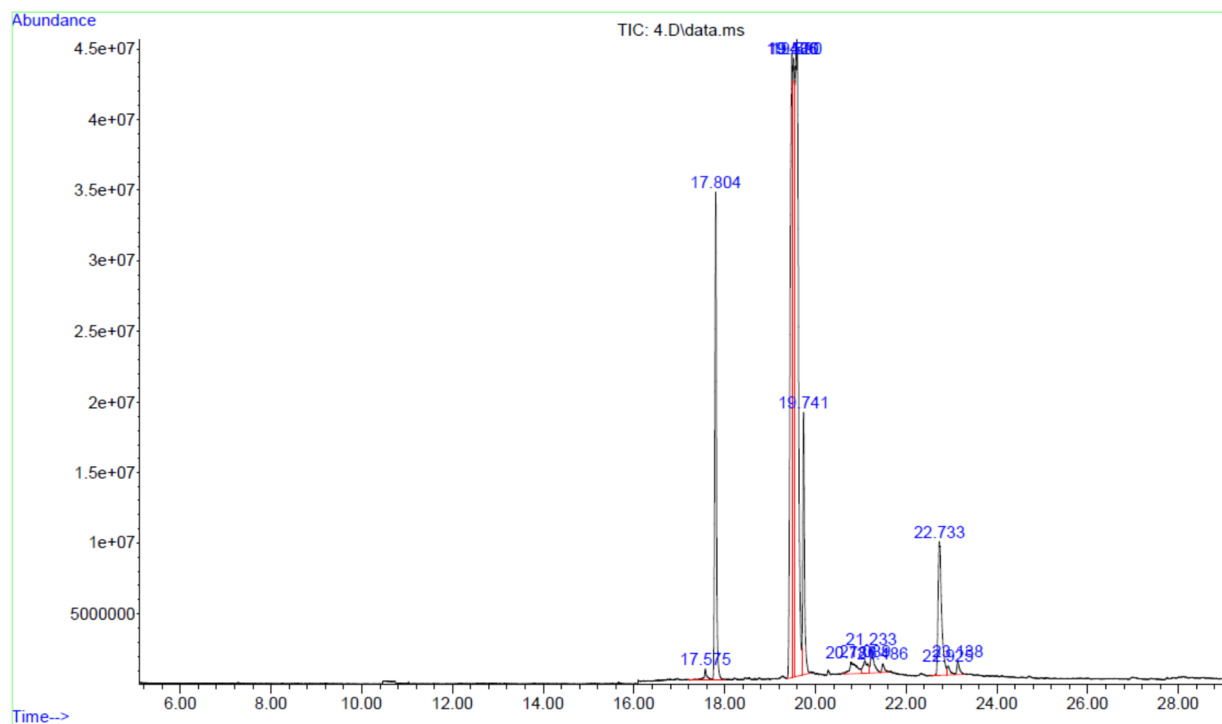

Figure S3. HPLC data to lipid content analysis of *Cladophora* algae biomass.

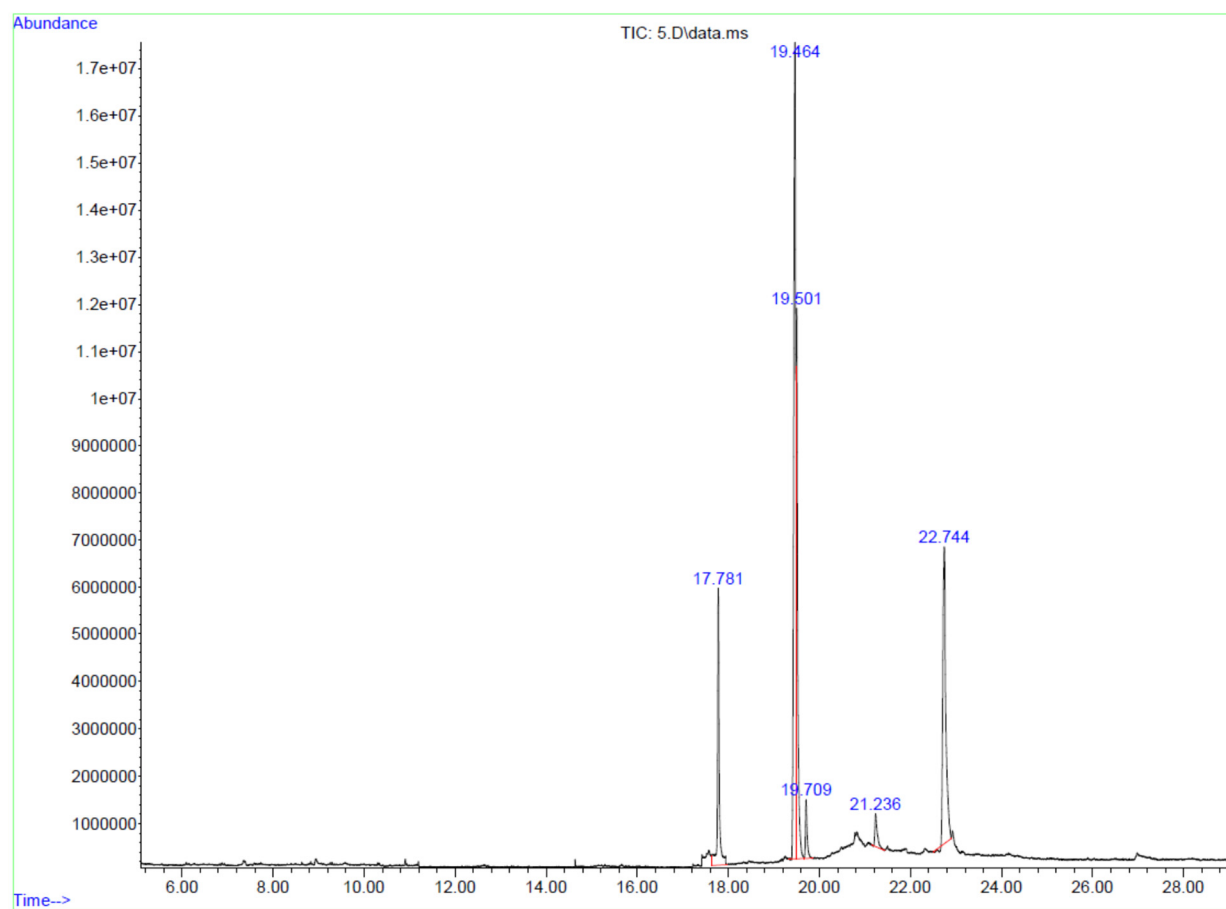

**Figure S4.** HPLC data to lipid content analysis of *Furcellaria* algae biomass.
